# Supplementary material
Source: PubMed Central journal article supplement (PMC3743278)
Supplement: jn.113.178178_nutrition178178SupplementaryData1.pdf [file jn.113.178178_nutrition178178SupplementaryData1.pdf]

## Online Supporting Material

**Supplemental Table 1.** Semi-purified diet compositions<sup>1</sup>

| Diet Constituent<br>(g/kg diet) | Study One Diets |      |      |      | Study Two Diets |                 |     |     |
|---------------------------------|-----------------|------|------|------|-----------------|-----------------|-----|-----|
|                                 | CO-C            | CO-P | FO-C | FO-P | CO              | DHA<br>+<br>EPA | EPA | DHA |
| Casein                          | 200             | 200  | 200  | 200  | 200             | 200             | 200 | 200 |
| DL-Methionine                   | 3               | 3    | 3    | 3    | 3               | 3               | 3   | 3   |
| Sucrose                         | 320             | 320  | 320  | 320  | 440             | 440             | 440 | 440 |
| Corn Starch                     | 220             | 220  | 220  | 220  | 220             | 220             | 220 | 220 |
| Cellulose                       | 60              | 0    | 60   | 0    | 60              | 60              | 60  | 60  |
| Pectin                          | 0               | 60   | 0    | 60   | 0               | 0               | 0   | 0   |
| AIN-76 Mineral Mix <sup>2</sup> | 10              | 10   | 10   | 10   | 10              | 10              | 10  | 10  |
| AIN-76 Salt Mix                 | 35              | 35   | 35   | 35   | 35              | 35              | 35  | 35  |
| Choline Chloride                | 2               | 2    | 2    | 2    | 2               | 2               | 2   | 2   |
| CO                              | 150             | 150  | 35   | 35   | 30              | 20              | 20  | 20  |
| FO                              | 0               | 0    | 115  | 115  | 0               | 0               | 0   | 0   |
| EPA                             | 0               | 0    | 0    | 0    | 0               | 5               | 10  | 0   |
| DHA                             | 0               | 0    | 0    | 0    | 0               | 5               | 0   | 10  |
| % energy from (n-3)<br>PUFA     | 0.3             | 0.3  | 6.9  | 7.6  | trace           | 2.5             | 2.8 | 2.8 |

<sup>1</sup>All dry diet constituents were purchased from Bio Serv (Bio Serv, Frenchtown, NJ). Corn oil (CO, Dyets, Madison, WI), fish oil (FO, Omega Protein Inc, Reedville, VA), DHA ethyl ester (>70% pure, Incromega DHA700E SR; Bioriginal Food & Science Corp, Saskatchewan, Canada) and EPA free fatty acid (>95% pure, SLA Pharma, Watford, UK). CO-C (corn oil + cellulose), CO-P (corn oil + pectin), FO-C (fish oil + cellulose) and FO-P (fish oil + pectin).

<sup>2</sup>AIN 76 mineral mix (48).

## Online Supporting Material

**Supplemental Table 2.** Dietary fatty acid composition and % energy

|                          | Study One Diets      |       |      |      | Study Two Diets |                 |       |       |
|--------------------------|----------------------|-------|------|------|-----------------|-----------------|-------|-------|
|                          | CO-C                 | CO-P  | FO-C | FO-P | CO              | DHA<br>+<br>EPA | DHA   | EPA   |
| Fatty acid <sup>1</sup>  | (g/100g fatty acids) |       |      |      |                 |                 |       |       |
| 14:0                     | trace <sup>2</sup>   | trace | 6.9  | 6.7  | trace           | trace           | trace | trace |
| 16:0                     | 11.6                 | 11.3  | 18.0 | 18.4 | 12.1            | 8.9             | 8.9   | 8.6   |
| 16:1(n-7)                | trace                | trace | 8.5  | 9.0  | trace           | trace           | trace | trace |
| 18:0                     | 1.9                  | 1.8   | 3.3  | 3.5  | trace           | 1.4             | 1.8   | 1.6   |
| 18:1(n-9)                | 29.1                 | 28.9  | 14.7 | 15.1 | 34.3            | 15.8            | 17.8  | 16.7  |
| 18:2(n-6)                | 55.4                 | 55.8  | 17.4 | 17.7 | 51.4            | 37.8            | 33.3  | 31.7  |
| 18:3(n-3)                | 0.9                  | 0.9   | 2.5  | 2.8  | trace           | 0.6             | 0.7   | 0.8   |
| 20:5(n-3)                | trace                | trace | 9.5  | 10.9 | trace           | 21.0            | 36.9  | 4.4   |
| 22:5(n-3)                | trace                | trace | 1.4  | 1.7  | trace           | trace           | trace | trace |
| 22:6(n-3)                | trace                | trace | 6.2  | 7.2  | trace           | 12.5            | trace | 31.6  |
| % Energy from lipid      | 31.2                 | 31.2  | 31.2 | 31.2 | 7.3             | 7.3             | 7.3   | 7.3   |
| % Energy from (n-3) PUFA | 0.3                  | 0.3   | 6.9  | 7.6  | trace           | 2.5             | 2.8   | 2.8   |

<sup>1</sup>Only the major fatty acids (> 1g/100 g) are listed

<sup>2</sup>trace, trace amount (< 0.05)

## Online Supporting Material

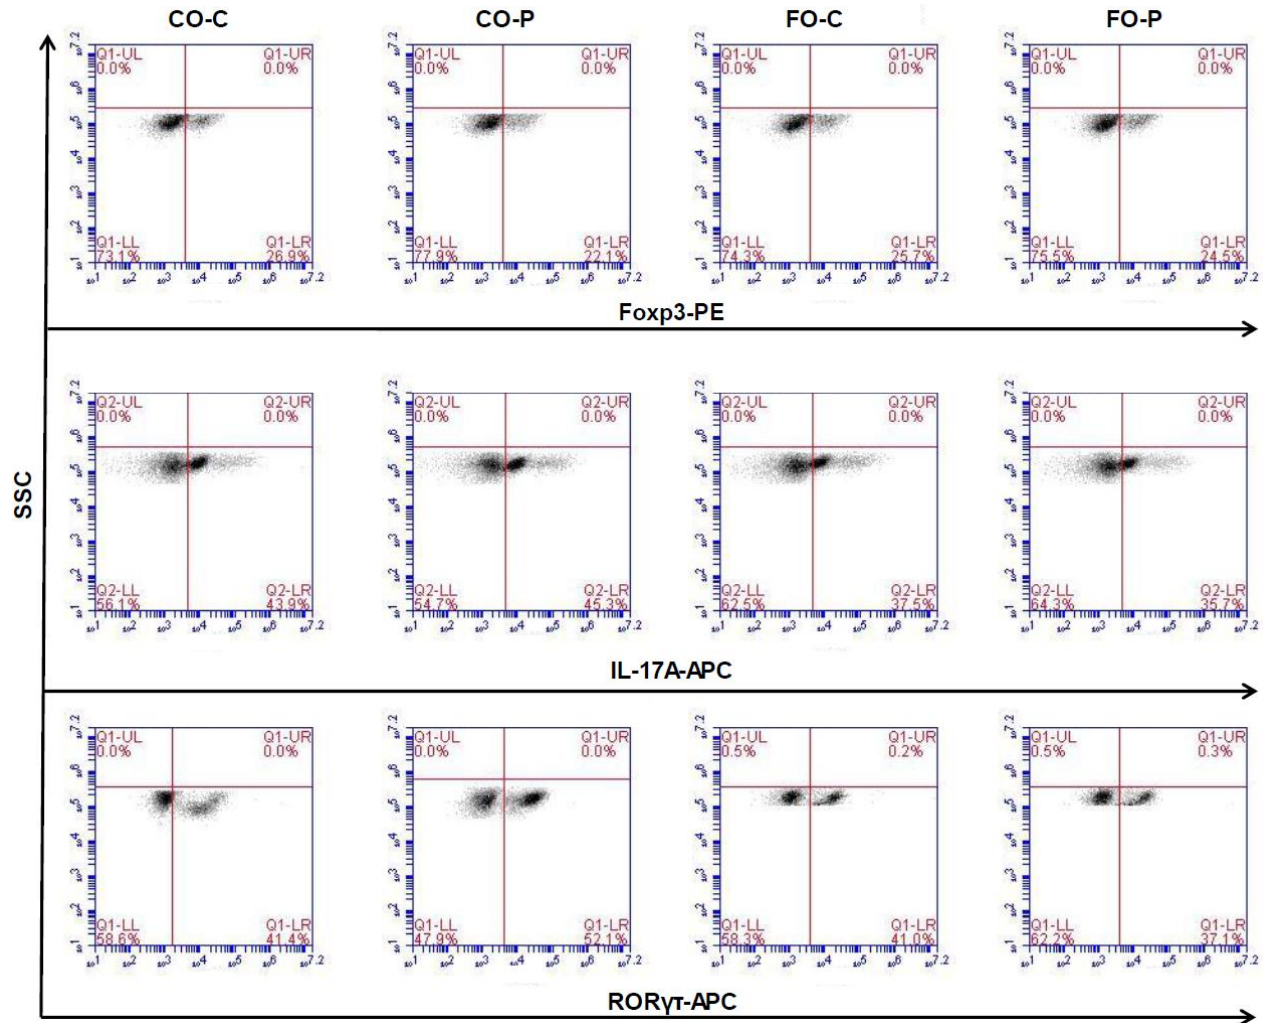

**Supplemental Figure 1.** Representative dot plots depicting the detection of T cell subsets by intracellular expression of Treg and Th17 cell markers. Dietary groups (see Materials and Methods) are shown at the top of each column. Purified splenic CD4<sup>+</sup> T cells were gated based on side scatter (SSC, y axis) versus the specific marker for each T cell subset (x axis). Tregs were identified as Fcpx3-PE<sup>+</sup> cells (top row). Th17 cells were identified by expression of either the signature cytokine IL-17A-APC<sup>+</sup> cells (middle row) or by expression of the signature transcription factor RORγt-APC<sup>+</sup> cells (bottom row). Flow cytometric analysis was conducted using an Accuri C6 flow cytometer (Accuri Cytometers). CO-C, corn oil + cellulose; CO-P, corn oil + pectin; FO-C, fish oil + cellulose and FO-P, fish oil + pectin

## Online Supporting Material

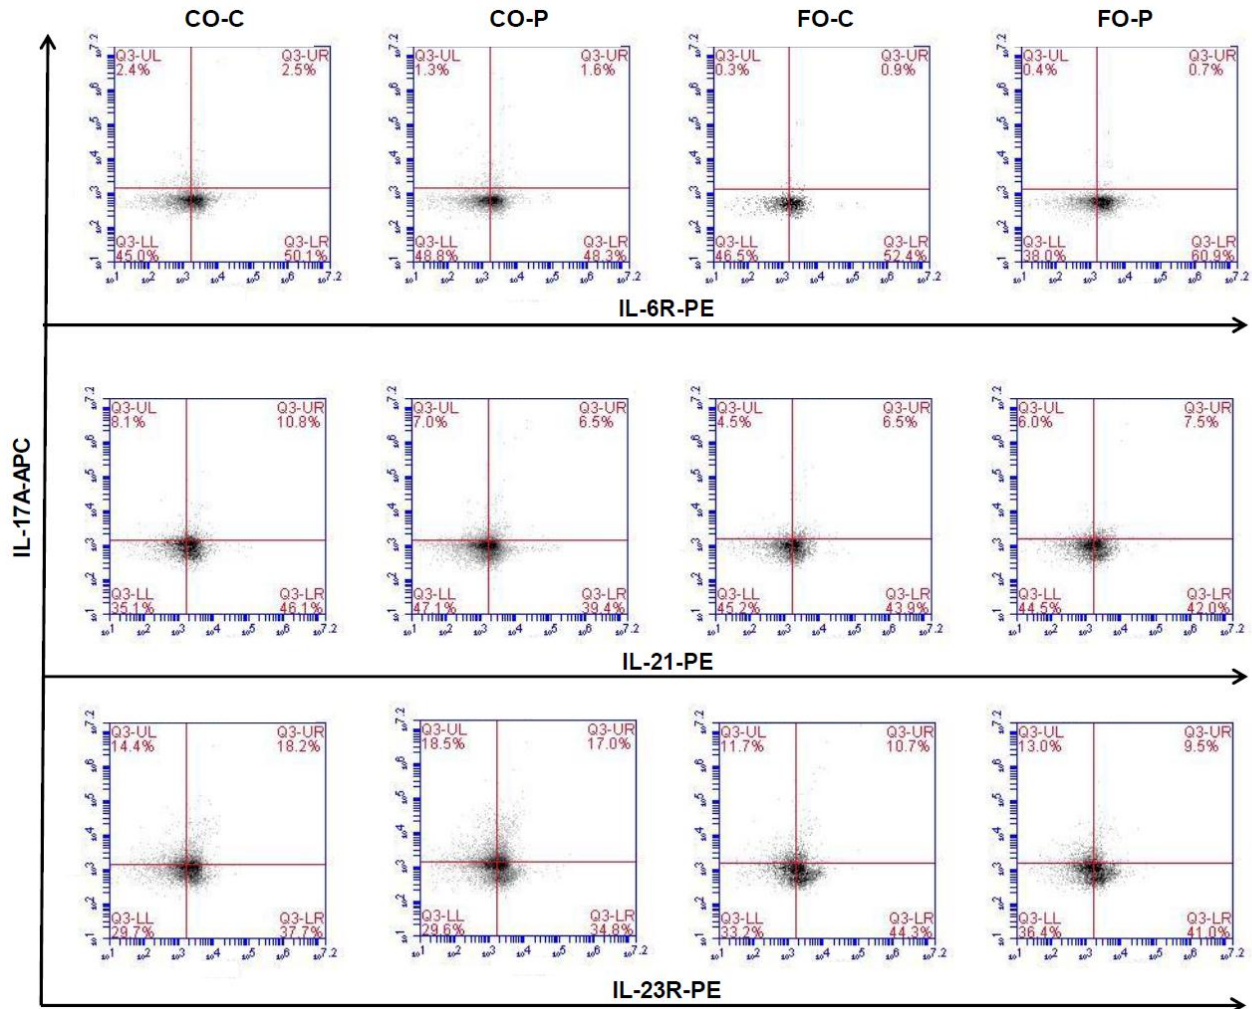

**Supplemental Figure 2.** Representative dot plots depicting the detection of polarized Th17 cells co-expressing surface cytokine receptors. Dietary groups are shown at the top of each column (see Materials and Methods). The percentage of splenic Th17 cells co-expressing specific cytokine receptors was determined by intracellular detection of the Th17 cell signature cytokine IL-17A-APC<sup>+</sup> cells (y axis) versus cytokine receptor surface expression (x axis). IL-17A-APC<sup>+</sup>/IL-6R-PE<sup>+</sup> cells (top row), IL-17A-APC<sup>+</sup>/IL-21R-PE<sup>+</sup> cells (middle row), IL-17A-APC<sup>+</sup>/IL-23R-PE<sup>+</sup> cells (bottom row). Flow cytometric analysis was conducted using an Accuri C6 flow cytometer (Accuri Cytometers). CO-C, corn oil + cellulose; CO-P, corn oil + pectin; FO-C, fish oil + cellulose; FO-P, fish oil + pectin.

## Online Supporting Material

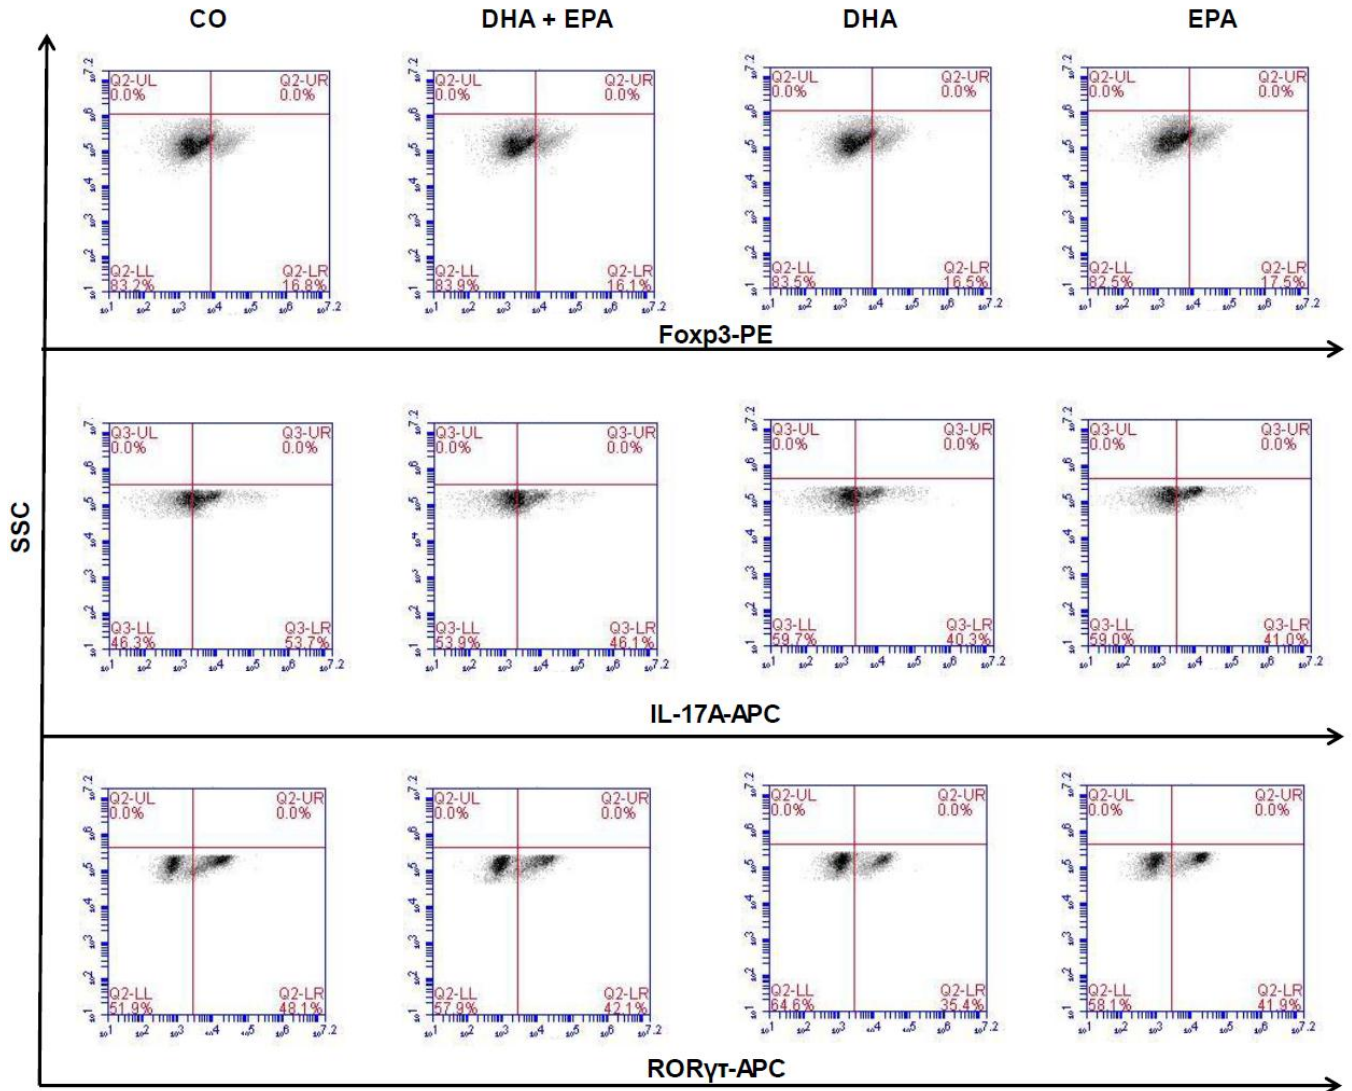

**Supplemental Figure 3.** Representative dot plots depicting the detection of T cell subsets by intracellular expression of Treg and Th17 cell markers. Dietary groups (see Materials and Methods) are shown at the top of each column. Purified splenic CD4<sup>+</sup> T cells were gated based on side scatter (SSC, y axis) versus the specific marker for each T cell subset (x axis). Tregs were identified as Fcpx3-PE<sup>+</sup> cells (top row). Th17 cells were identified by expression of either the signature cytokine IL-17A-APC<sup>+</sup> cells (middle row) or by expression of the signature transcription factor RORγT-APC<sup>+</sup> cells (bottom row). Flow cytometric analysis was conducted using an Accuri C6 flow cytometer (Accuri Cytometers).
